# Supplementary material for: Thymosin Beta-4 and Ciprofloxacin Adjunctive Therapy Improves Pseudomonas aeruginosa-Induced Keratitis
Source: PubMed Central journal article supplement (PMC6210523; doi:10.3390/cells7100145), 2018-09-20
Supplement: cells-07-00145-s001.pdf [file cells-07-00145-s001.pdf]

Figure S1.

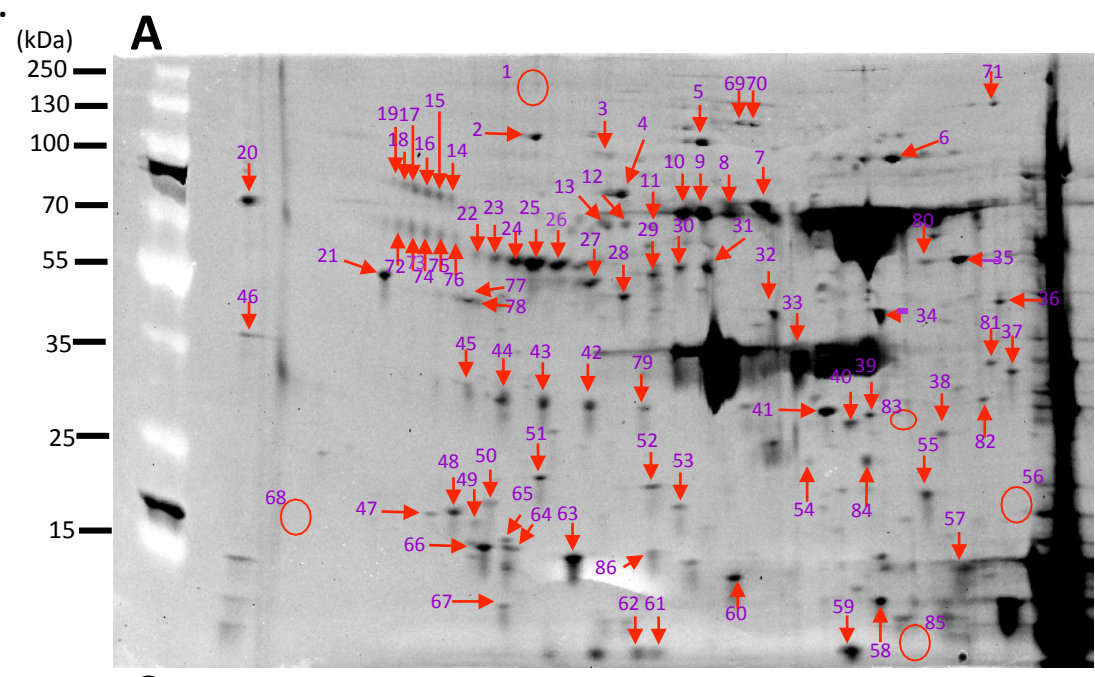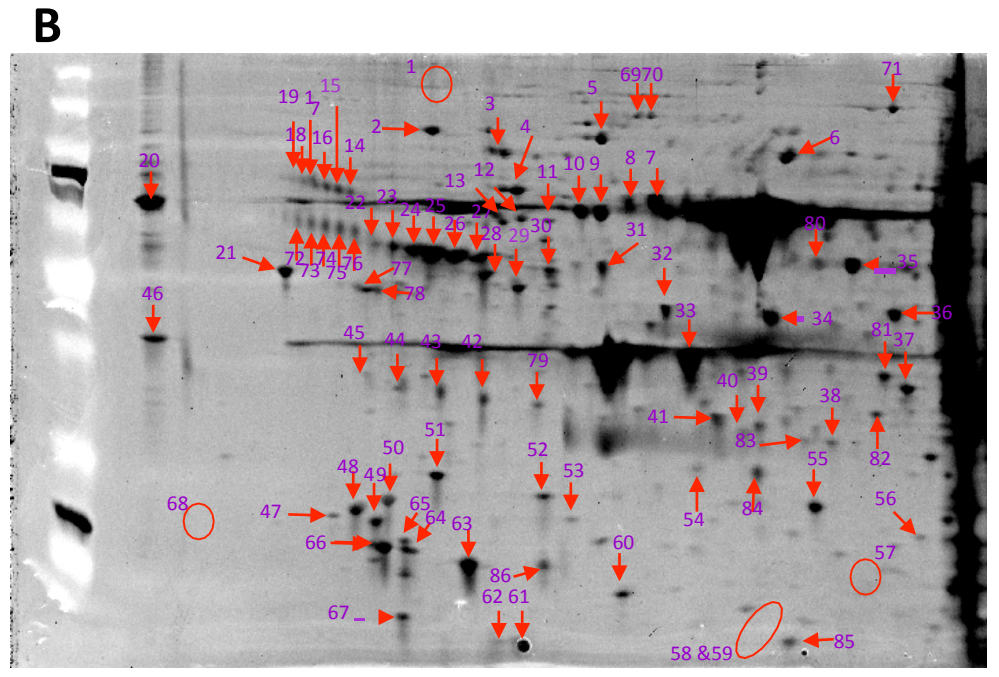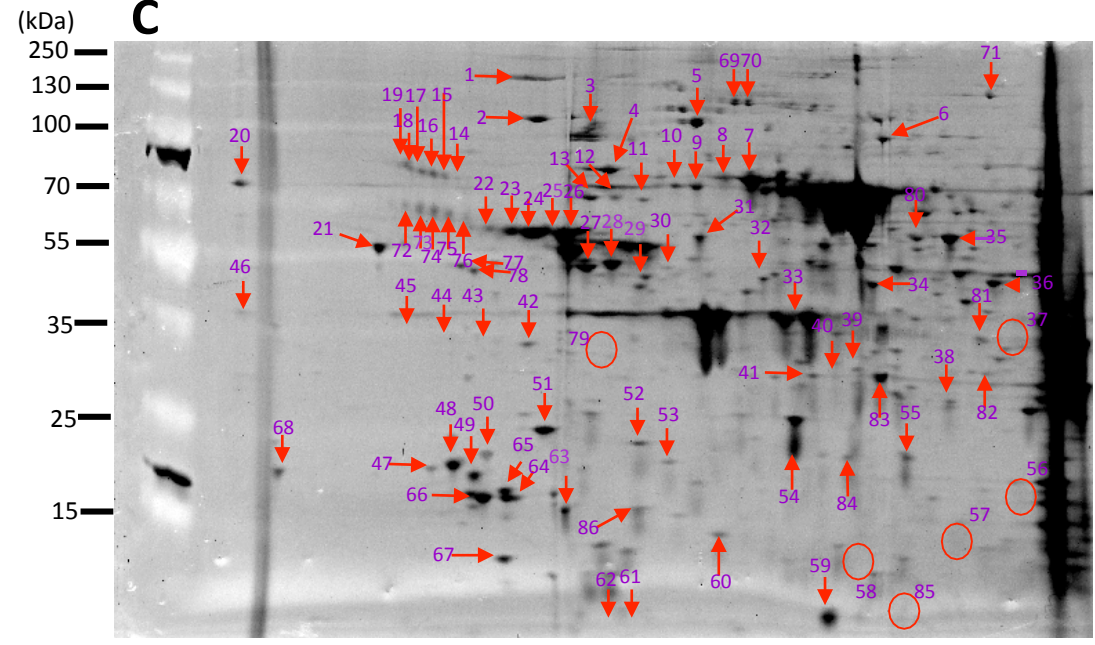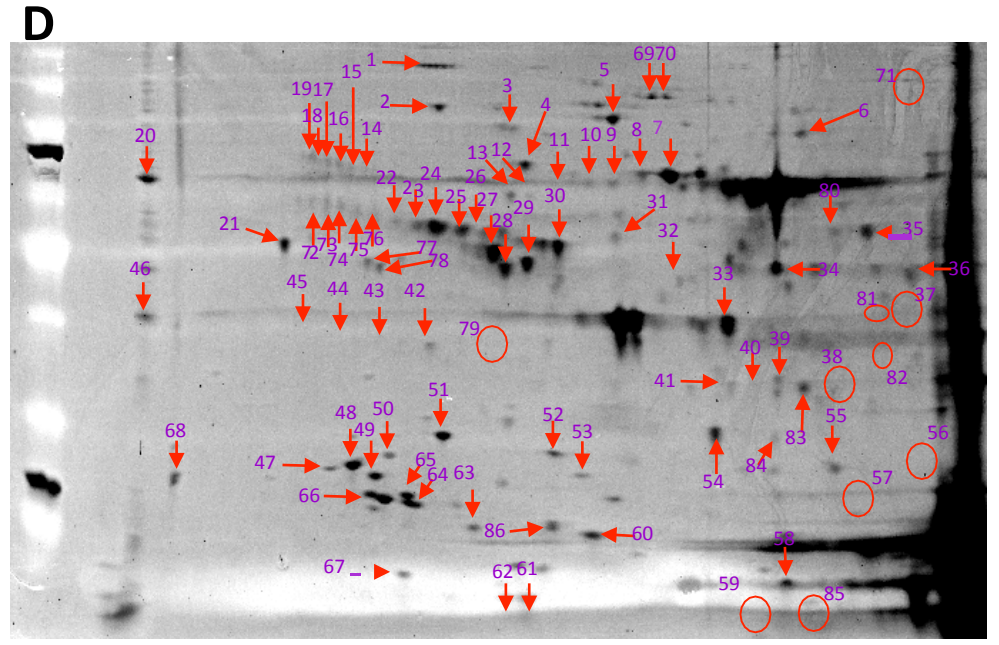

Figure S2.

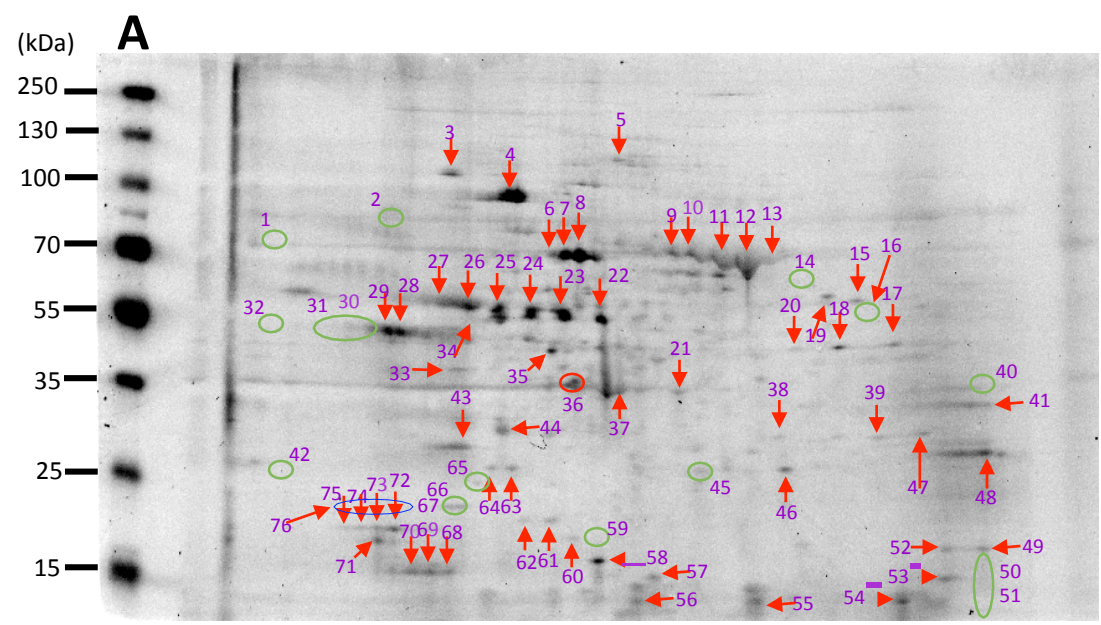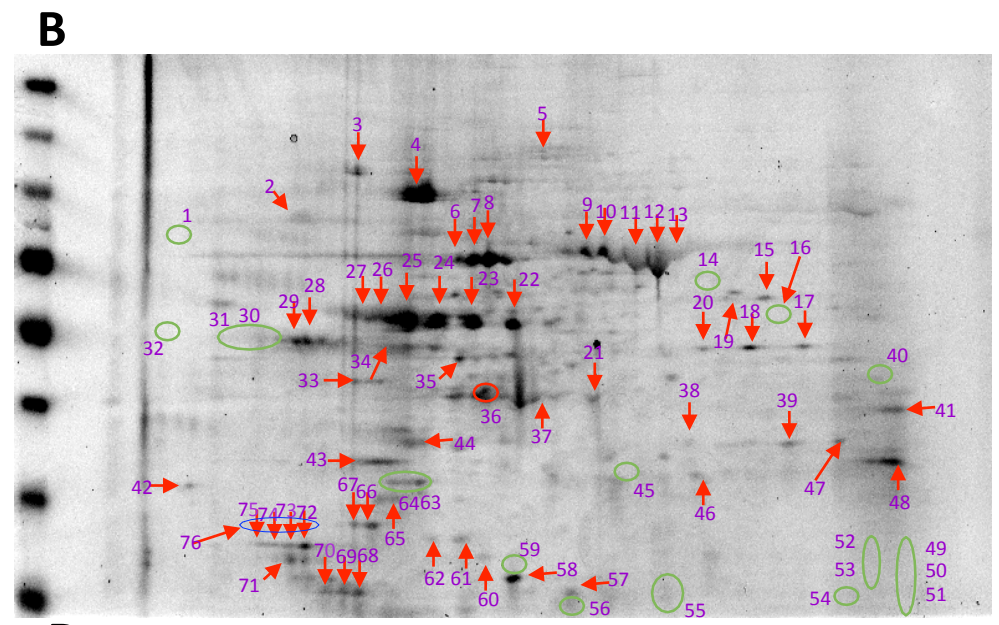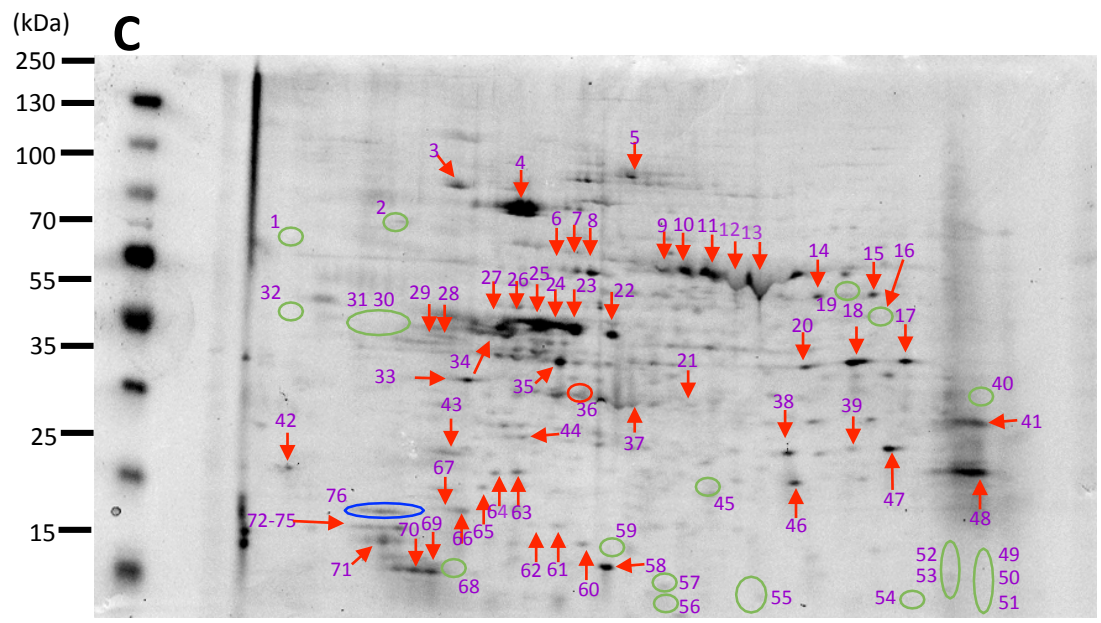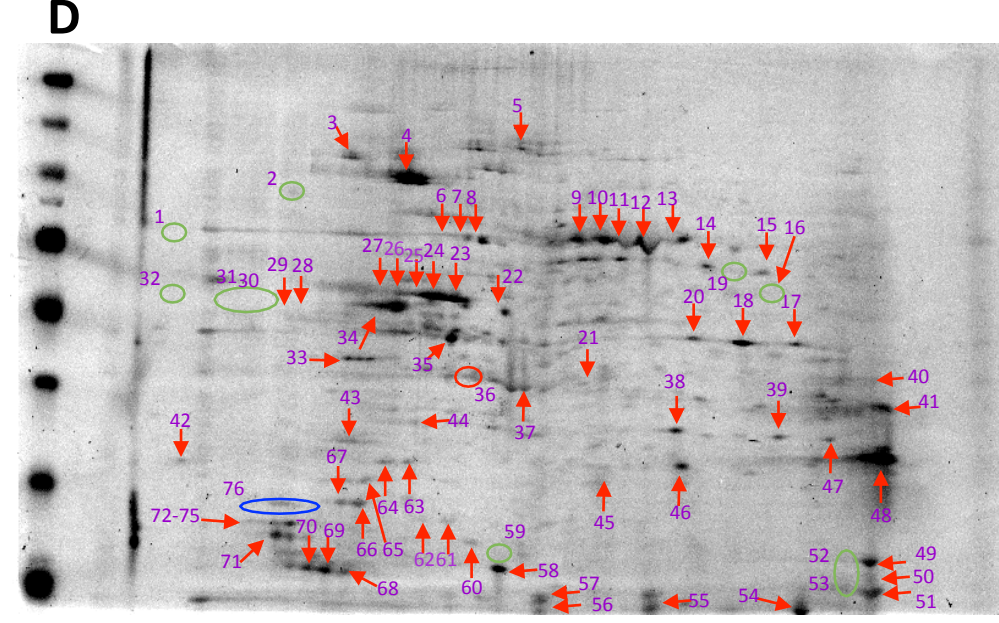

| Spot # | 3 days p.i. |     |       |           | 5 days p.i. |     |       |           |
|--------|-------------|-----|-------|-----------|-------------|-----|-------|-----------|
|        | PBS         | Tβ4 | Cipro | Tβ4+Cipro | PBS         | Tβ4 | Cipro | Tβ4+Cipro |
| 1      | -           | -   | +     | ++        | -           | -   | +     | +         |
| 2      | +           | ++  | ++    | ++        | ++          | +++ | +++   | +++       |
| 3      | -           | +   | ++    | -         | -           | ++  | +++   | -         |
| 4      | +           | +   | +     | +         | ++          | ++  | ++    | ++        |
| 5      | +           | ++  | +++   | +++       | +++         | +++ | +++   | +++       |
| 6      | ++          | ++  | +     | +         | ++          | +++ | +     | +         |
| 7      | +++         | +++ | +++   | +         | +++         | +++ | +++   | +++       |
| 8      | +           | ++  | +     | +         | +++         | +++ | +     | +         |
| 9      | +++         | +++ | ++    | ++        | +++         | +++ | ++    | -         |
| 10     | +++         | +++ | ++    | ++        | +++         | +++ | ++    | -         |
| 11     | +           | +   | +     | +         | +           | ++  | +     | +         |
| 12     | +           | ++  | +     | +         | +           | +   | +     | -         |
| 13     | +           | ++  | ++    | ++        | +           | +   | ++    | +         |
| 14     | +           | +   | -     | -         | +           | +   | +     | +         |
| 15     | +           | +   | +     | +         | +           | ++  | +     | +         |
| 16     | +           | +   | +     | +         | +           | ++  | +     | +         |
| 17     | +           | +   | +     | +         | +           | ++  | +     | +         |
| 18     | +           | +   | +     | +         | +           | ++  | +     | +         |
| 19     | +           | +   | -     | -         | +           | +   | +     | +         |
| 20     | ++          | +++ | +     | ++        | ++          | +++ | +     | ++        |
| 21     | +           | ++  | ++    | ++        | ++          | ++  | ++    | ++        |
| 22     | +           | +   | -     | -         | +           | +   | +     | +         |
| 23     | ++          | ++  | +     | +         | +           | +++ | +     | +         |
| 24     | ++          | +++ | ++    | ++        | +++         | +++ | +++   | +++       |
| 25     | +++         | +++ | +++   | +++       | +++         | +++ | +++   | +++       |
| 26     | +++         | +++ | +++   | +++       | +++         | +++ | +++   | +         |
| 27     | ++          | +++ | +++   | +++       | ++          | ++  | +++   | +++       |
| 28     | +           | +   | +     | ++        | ++          | ++  | +++   | +++       |
| 29     | +           | +   | +     | ++        | ++          | ++  | +++   | +++       |
| 30     | +           | +++ | +++   | +++       | ++          | ++  | +     | +++       |
| 31     | +           | +++ | ++    | ++        | +++         | +++ | ++    | +         |
| 32     | +           | +   | +     | +         | ++          | ++  | ++    | +         |
| 33     | +++         | +++ | ++    | ++        | +++         | +++ | ++    | ++        |
| 34     | ++          | ++  | +     | +         | ++          | +++ | +     | ++        |
| 35     | ++          | ++  | +     | ++        | ++          | +++ | ++    | ++        |
| 36     | +           | +   | +     | +         | +           | ++  | ++    | +         |
| 37     | +           | -   | -     | -         | ++          | +++ | -     | -         |
| 38     | +           | +   | -     | -         | +           | +   | +     | -         |
| 39     | +           | +   | +     | -         | ++          | ++  | +     | +         |
| 40     | +           | +   | -     | -         | ++          | +   | -     | -         |
| 41     | ++          | ++  | +     | +         | +++         | ++  | +     | +         |
| 42     | +++         | +++ | +     | +         | +++         | +++ | +     | +         |
| 43     | +++         | +++ | -     | -         | +++         | +++ | -     | -         |
| 44     | +++         | +++ | -     | -         | +++         | ++  | -     | -         |
| 45     | ++          | +   | -     | -         | +           | +   | -     | -         |
| 46     | +           | ++  | -     | +         | +           | +++ | -     | +         |
| 47     | +           | +   | +     | +         | +           | +   | +     | +         |
| 48     | +           | +   | +     | ++        | ++          | +++ | +++   | +++       |
| 49     | +           | +   | ++    | ++        | +           | +++ | +++   | +++       |
| 50     | +           | +   | +     | +         | +           | ++  | +     | +         |
| 51     | +           | +   | ++    | ++        | +           | +   | ++    | ++        |
| 52     | +           | +   | +     | +         | +           | ++  | +     | +         |
| 53     | +           | +   | +     | +         | +           | +   | +     | +         |
| 54     | +           | ++  | ++    | ++        | +           | ++  | +++   | ++        |
| 55     | +           | +   | -     | -         | ++          | +++ | +     | +         |
| 56     | ++          | -   | -     | -         | +           | -   | -     | -         |
| 57     | +           | -   | -     | -         | ++          | -   | -     | -         |
| 58     | +           | -   | -     | -         | ++          | -   | -     | ++        |
| 59     | ++          | -   | -     | -         | +++         | -   | +++   | -         |
| 60     | ++          | ++  | +     | +         | ++          | ++  | +     | ++        |
| 61     | -           | -   | +     | +         | +           | -   | -     | -         |
| 62     | -           | -   | +     | +         | +           | -   | -     | -         |
| 63     | +++         | +++ | +     | +         | +++         | +++ | +     | +         |
| 64     | +           | +   | +     | ++        | +           | +++ | +++   | +++       |
| 65     | +           | +   | +     | ++        | +           | +++ | +++   | +++       |
| 66     | ++          | ++  | ++    | ++        | ++          | ++  | ++    | ++        |
| 67     | -           | -   | -     | +         | +           | ++  | ++    | +         |
| 68     | -           | -   | +     | ++        | -           | -   | ++    | ++        |
| 69     | +           | +   | ++    | ++        | ++          | ++  | ++    | ++        |
| 70     | +           | +   | ++    | ++        | ++          | ++  | ++    | ++        |
| 71     | -           | -   | -     | -         | +           | +   | +     | +         |
| 72     | +           | +   | -     | -         | ++          | +   | +     | +         |
| 73     | +           | +   | +     | +         | +           | ++  | +     | +         |
| 74     | +           | +   | +     | +         | +           | ++  | +     | +         |
| 75     | +           | +   | +     | +         | +           | ++  | +     | +         |
| 76     | +           | +   | +     | +         | -           | ++  | -     | -         |
| 77     | +           | +   | +     | +         | +           | +   | ++    | ++        |
| 78     | +           | +   | +     | +         | +           | +   | ++    | ++        |
| 79     | +           | ++  | -     | -         | +           | +   | -     | -         |
| 80     | -           | -   | -     | -         | +           | ++  | ++    | +         |
| 81     | +           | -   | -     | -         | +           | +++ | +     | -         |
| 82     | +           | -   | -     | -         | +           | ++  | -     | -         |
| 83     | -           | -   | -     | -         | -           | -   | +++   | ++        |
| 84     | +           | +   | -     | -         | ++          | +++ | +     | +         |
| 85     | -           | -   | -     | -         | -           | +++ | -     | -         |
| 86     | +           | +   | +     | +         | +           | ++  | +     | ++        |

Table S1. Qualitative comparison of total protein expression between treatment groups at 3 and 5 days p.i.  
Key: -; No Expression; +, Low Expression; ++, Medium Expression; +++, High Expression

| Spot # | 3 days p.i. |     |       |           | 5 days p.i. |     |       |           |
|--------|-------------|-----|-------|-----------|-------------|-----|-------|-----------|
|        | PBS         | TB4 | Cipro | TB4+Cipro | PBS         | TB4 | Cipro | TB4+Cipro |
| 1      | -           | -   | -     | -         | -           | -   | -     | -         |
| 2      | -           | +   | +     | -         | -           | +   | -     | -         |
| 3      | +           | +   | +     | +         | +           | +   | +     | +         |
| 4      | +++         | +++ | +++   | +++       | +++         | +++ | +++   | +++       |
| 5      | -           | -   | +     | -         | -           | +   | -     | +         |
| 6      | +           | +   | -     | -         | +           | +   | -     | -         |
| 7      | +++         | +++ | -     | -         | +++         | +++ | +     | +         |
| 8      | +++         | +++ | +     | +         | +++         | +++ | +     | +         |
| 9      | +           | +   | +     | ++        | +           | ++  | ++    | ++        |
| 10     | +           | +   | +     | ++        | +           | ++  | ++    | ++        |
| 11     | ++          | ++  | +     | ++        | +           | +   | +     | +         |
| 12     | ++          | +++ | ++    | ++        | ++          | ++  | ++    | ++        |
| 13     | -           | +   | +     | ++        | -           | -   | ++    | ++        |
| 14     | -           | +   | +     | ++        | -           | -   | +     | +         |
| 15     | ++          | -   | -     | ++        | +           | +   | +     | ++        |
| 16     | -           | -   | +     | +         | -           | -   | -     | -         |
| 17     | +           | +   | ++    | +         | +           | +   | ++    | +         |
| 18     | ++          | ++  | +++   | +++       | ++          | ++  | +++   | +++       |
| 19     | +           | +   | -     | +         | +           | -   | -     | -         |
| 20     | +           | +   | +     | +         | -           | +   | +     | +         |
| 21     | +           | +   | -     | -         | +           | -   | -     | -         |
| 22     | ++          | ++  | ++    | ++        | ++          | +++ | ++    | +         |
| 23     | +++         | +++ | +     | +         | +++         | +++ | +++   | ++        |
| 24     | +++         | +++ | +     | +         | +++         | +++ | +++   | ++        |
| 25     | +++         | +++ | +     | +         | +++         | +++ | +++   | ++        |
| 26     | +++         | +++ | +     | +         | +++         | +++ | +++   | ++        |
| 27     | +++         | +++ | -     | +++       | +           | +   | +     | +         |
| 28     | +           | ++  | -     | -         | ++          | ++  | -     | -         |
| 29     | ++          | ++  | -     | -         | ++          | ++  | -     | -         |
| 30     | +           | +   | -     | -         | -           | -   | -     | -         |
| 31     | +           | +   | -     | -         | -           | -   | -     | -         |
| 32     | -           | -   | -     | +         | -           | -   | -     | -         |
| 33     | -           | +   | +     | +         | -           | -   | +     | +         |
| 34     | +++         | +   | -     | -         | -           | -   | -     | -         |
| 35     | +           | ++  | ++    | ++        | +           | +   | ++    | ++        |
| 36     | ++          | +   | -     | -         | +++         | +++ | +     | +         |
| 37     | +           | +   | +     | +         | +           | +   | +     | +         |
| 38     | -           | -   | -     | +         | -           | -   | +     | +         |
| 39     | +           | +   | +     | +         | +           | +   | ++    | +         |
| 40     | -           | +   | -     | -         | -           | -   | -     | -         |
| 41     | +           | ++  | ++    | ++        | -           | ++  | ++    | +++       |
| 42     | +           | +   | +     | ++        | -           | -   | -     | -         |
| 43     | -           | -   | -     | -         | +           | -   | -     | -         |
| 44     | -           | -   | -     | -         | +           | +   | -     | -         |
| 45     | -           | +   | +     | +         | -           | -   | -     | -         |
| 46     | +           | +   | +     | ++        | +           | +   | ++    | ++        |
| 47     | +           | +   | +     | +         | +           | +   | -     | +         |
| 48     | ++          | ++  | ++    | ++        | +           | ++  | ++    | +++       |
| 49     | -           | -   | +     | -         | +           | -   | -     | ++        |
| 50     | -           | -   | +     | -         | -           | -   | -     | -         |
| 51     | -           | -   | +     | +         | -           | -   | -     | ++        |
| 52     | -           | -   | -     | -         | +           | -   | -     | -         |
| 53     | -           | -   | -     | -         | +           | -   | -     | -         |
| 54     | -           | -   | ++    | -         | +           | -   | -     | ++        |
| 55     | -           | -   | -     | -         | +           | -   | -     | +         |
| 56     | -           | -   | +     | +         | +           | -   | -     | +         |
| 57     | -           | -   | -     | -         | +           | +   | -     | ++        |
| 58     | +++         | ++  | +++   | +++       | ++          | +++ | ++    | ++        |
| 59     | ++          | -   | -     | -         | -           | -   | -     | -         |
| 60     | -           | -   | -     | -         | -           | -   | +     | +         |
| 61     | -           | -   | -     | -         | +           | +   | +     | +         |
| 62     | -           | -   | -     | -         | +           | +   | -     | -         |
| 63     | +           | -   | -     | +         | +           | -   | +     | +         |
| 64     | +           | -   | +     | +         | +           | +   | +     | +         |
| 65     | +           | +   | -     | +         | -           | +   | +     | +         |
| 66     | +           | +   | ++    | +         | +           | ++  | +     | ++        |
| 67     | -           | +   | +     | +         | +           | +   | -     | +         |
| 68     | -           | +   | -     | -         | -           | +   | -     | +         |
| 69     | +           | ++  | ++    | +         | +           | +   | +     | ++        |
| 70     | +           | +   | +     | ++        | +           | +   | +     | ++        |
| 71     | +           | +   | +     | +         | +           | +   | +     | ++        |
| 72     | +           | +   | +     | +         | +           | ++  | +     | +         |
| 73     | +           | +   | +     | +         | +           | +   | +     | +         |
| 74     | +           | +   | +     | +         | +           | +   | +     | +         |
| 75     | +           | +   | +     | +         | +           | +   | +     | +         |
| 76     | -           | -   | +     | ++        | -           | -   | +     | +         |

Table S2. Qualitative comparison of phosphoprotein expression between treatment groups at 3 and 5 days p.i. Key: -, No Expression; +, Low Expression; ++, Medium Expression; +++, High Expression
